# Supplementary material for: Anthropogenic Habitat Disturbance and Ecological Divergence between Incipient Species of the Malaria Mosquito Anopheles gambiae
Source: PubMed Central journal article supplement (PMC3382172; doi:10.1371/journal.pone.0039453), 2012-06-22
Supplement: pone.0039453.s004.pdf [file pone.0039453.s004.pdf]

| Variable                | Form M   |     |          | Form S   |     |          |
|-------------------------|----------|-----|----------|----------|-----|----------|
|                         | Deviance | d.f | <i>P</i> | Deviance | d.f | <i>P</i> |
| Built Environment Index | 16.81    | 1   | <0.001   | 63.07    | 1   | <0.001   |
| Average Density         | 22.92    | 1   | <0.001   | 19.72    | 1   | <0.001   |
| Sampling Effort         | 12.83    | 1   | <0.001   | 10.74    | 1   | <0.001   |
| Spatial Correlation     | 1.36     | 1   | 0.261    | 0.3      | 1   | 0.515    |
| Residual Error          | 199.98   | 187 |          | 133.93   | 187 |          |
| Total                   | 256      | 191 |          | 244.42   | 191 |          |
