# Supplementary material for: Anthropogenic Habitat Disturbance and Ecological Divergence between Incipient Species of the Malaria Mosquito Anopheles gambiae
Source: PubMed Central journal article supplement (PMC3382172; doi:10.1371/journal.pone.0039453), 2012-06-22
Supplement: pone.0039453.s005.pdf [file pone.0039453.s005.pdf]

| <b>Variable</b>         | <b>Form M</b> |       |          | <b>Form S</b> |       |          |
|-------------------------|---------------|-------|----------|---------------|-------|----------|
|                         | Estimate      | SE    | <i>P</i> | Estimate      | SE    | <i>P</i> |
| Intercept               | -4.184        | 0.66  | <0.001   | -1.507        | 0.522 | <0.01    |
| Built Environment Index | 1.778         | 0.47  | <0.001   | -6.418        | 1.051 | <0.001   |
| Average Density         | 8.263         | 1.876 | <0.001   | 5.703         | 1.391 | <0.001   |
| Sampling Effort         | 0.157         | 0.045 | <0.001   | 0.187         | 0.059 | <0.01    |
